# Supplementary material for: Prognostic Value and Relative Cutoffs of Triglycerides Predicting Cardiovascular Outcome in a Large Regional‐Based Italian Database
Source: PubMed Central journal article supplement — J Am Heart Assoc. 2024 Jan 31;13(3):e030319. doi: 10.1161/JAHA.123.030319 (PMC11056112; doi:10.1161/jaha.123.030319), 2024-01-31
Supplement: JAH3-13-e030319-s001.pdf [file JAH3-13-e030319-s001.pdf]

# **SUPPLEMENTAL MATERIAL**

**Table S1. ICD10 codes used for diagnosis of cardiovascular events.**

---

|                                             |                            |
|---------------------------------------------|----------------------------|
| Major cardiovascular diseases               | I00-I78                    |
| Diseases of heart                           | I00-I78, I11, I13, I20-I51 |
| Hypertensive heart disease                  | I11, I13                   |
| Ischemia heart disease                      | I20-I25                    |
| Other diseases od heart                     | I00-I09, I26-I51           |
| Hypertension and hypertensive renal disease | I10, I12                   |
| Cerebrovascular diseases                    | I60-I69                    |

---
